# Supplementary material
Source: Springer Nature journal article supplement (https://www.springermedizin.de/resource/supplementary/12958_2008_458_MOESM1_ESM.pdf/9567942)

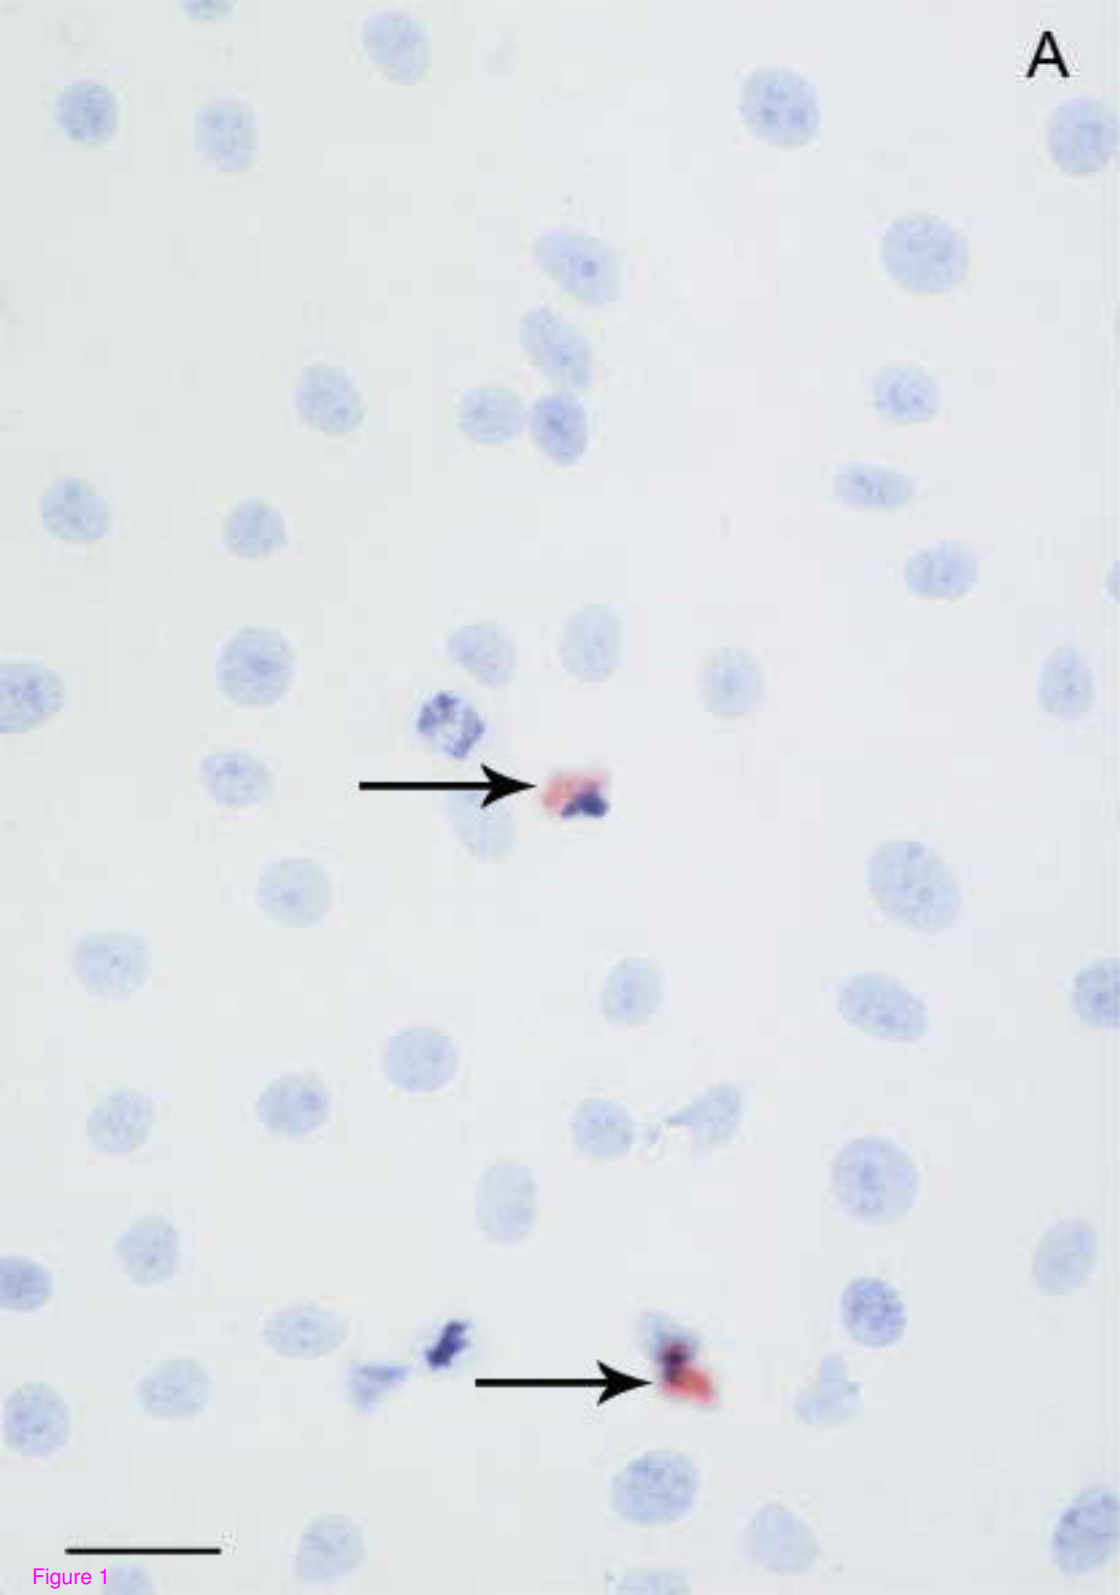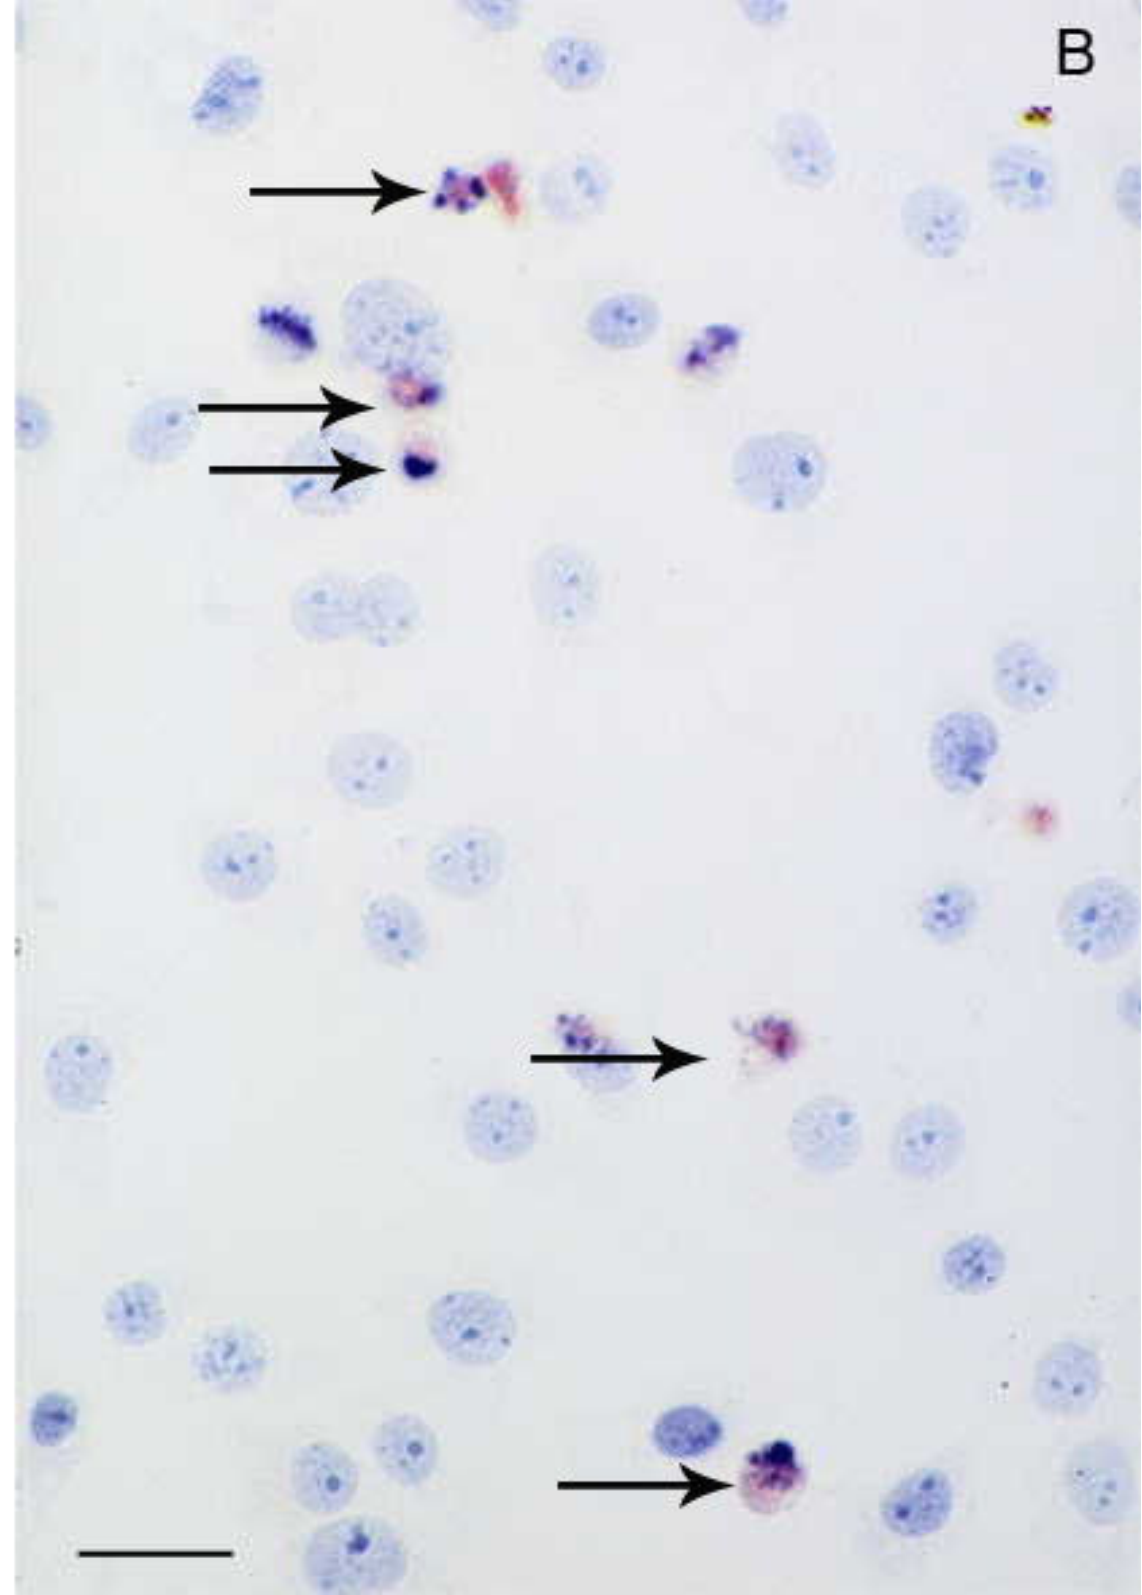

Figure 1

Supplement: MOESM1 [file 9567942]
